# Supplementary material
Source: MDPI journal article supplement (https://www.mdpi.com/2079-9276/10/6/60)
Supplement: s1 [file s1]

## Article

# Evaluation of Environmental and Economic Benefits of Land Reclamation in the Indonesian Coal Mining Industry

Imam Eko Setiawan, Zhengyang Zhang, Glen Corder and Kazuyo Matsubae

## Supplementary Material

Table S1. General heavy equipment for land preparation task.

| Type of Heavy Equipment | Unit Series or Type       | Specifications          | Unit                                 |
|-------------------------|---------------------------|-------------------------|--------------------------------------|
| Hydraulic Excavator     | PC-200 or similar         | Horsepower (gross)      | 147 HP/ 2000 rpm                     |
|                         |                           | Horsepower (net)        | 138 HP/ 2000 rpm                     |
|                         |                           | Operating weight        | 19800–20500 kg                       |
|                         |                           | Bucket capacity         | 0.5–1.2 m <sup>3</sup>               |
|                         |                           | Tank capacity (Full)    | 400 Liters                           |
|                         |                           | Bucket capacity<br>Fuel | 0.8 m <sup>3</sup><br>Diesel machine |
| Bulldozer (Dozer)       | D 65P LGP or<br>D 6 R LGP | Engine power            | 121 kW                               |
|                         |                           | Operating weight        | 15440 kg                             |
|                         |                           | Tank capacity (Full)    | 320 Liters                           |
|                         |                           | Width of blade          | 3.99 meter                           |
|                         |                           | Height of blade         | 1.05 meter                           |
|                         |                           | Fuel                    | Diesel machine                       |
| Dump Truck              | Class capacity 20 ton     | Power                   | 260 PS/ 2500 rpm                     |
|                         |                           | GVWR                    | 26000 kg                             |
|                         |                           | Load capacity           | m <sup>3</sup>                       |
|                         |                           | Tank capacity           | 200 Liters                           |
|                         |                           | Fuel                    | Diesel machine                       |

*Note: effectivity rate of all equipment on 70-85%*

Table S2. Properties of each revegetation technique (mining company, personal communication, 2018).

| Properties                                             | Conventional Technique                                                   | Mechanical Technique                                          |
|--------------------------------------------------------|--------------------------------------------------------------------------|---------------------------------------------------------------|
| Water usage (Liter/ ha)                                | 2, 500–4,000                                                             | 20,000                                                        |
| Fuel usage (diesel, Liter/ ha)                         | 50–60                                                                    | 130                                                           |
| Organic material used                                  | Less                                                                     | High rate                                                     |
| Chemical material used                                 | Less (if necessary)                                                      | Less (if necessary)                                           |
| Target area                                            | Flat, slope max. 30%                                                     | Flat to the steep slope (30-60%), well-access                 |
| Growth successful rate                                 | Trees: moderate-high<br>Land cover crop: low to moderate                 | Trees: low to moderate<br>Land cover crop: moderate-high      |
| Speed of coverage area by ground-cover crop (min. 80%) | Over six months on average                                               | 3-5 months on average                                         |
| Trees germination and growth                           | Three months in the nursery                                              | 3-6 months in the area                                        |
| Production rate (on average)                           | 15-25 ha/ month                                                          | 20-26 ha/ month                                               |
| Final result                                           | Trees: homogenous growth, line up in a row, plantation forest-like model | Trees: scattered, irregular growth, natural forest-like model |

**Table S3.** Primary resource and materials used in revegetation task (mining company, personal communication, 2018).

| Resources                          | Unit      | Conventional |                        | Mechanical          |                        |
|------------------------------------|-----------|--------------|------------------------|---------------------|------------------------|
|                                    |           | Planting     | Maintenance Allocation | Planting (Spraying) | Maintenance Allocation |
| Water                              | Liters/ha | 2500–4000    |                        | 20,000              |                        |
| Diesel Fuel                        | Liters/ha | 50–60        |                        | 130                 |                        |
| Electricity                        | kWh/ha    | 0            |                        | 18.15–23.6          |                        |
| Materials:                         |           |              |                        |                     |                        |
| (a.) Adhesive/ bonding agent       | Kg/ha     | 0            | 0                      | 15–20               | 1.5–2                  |
| (b.) Organic fertilizer            | Kg/ha     | 3,300        | 0                      | 145–175             | 15–17.5                |
| (c.) Chicken manure or compost     | Kg/ha     | 0            | 0                      | 3500–5000           | 350–500                |
| (d.) Organic material for mulch    | Kg/ha     | 0            | 0                      | 1500–2500           | 150–250                |
| (e.) Chemical*                     | Kg/ha     | 0            | 5                      | 300                 | 300                    |
| Seeds of land cover crop and trees | Kg/ha     | 25–40        | 0                      | 100                 | 100                    |
| Seedlings                          | Trees/ha  | 1,111        | 111                    | 0                   | 0                      |

**Table S4.** Fuel consumption of heavy equipment for reclamation work.

| Activities         | Heavy Equipment               | Fuel Consumption (Liter/ ha) |
|--------------------|-------------------------------|------------------------------|
| Topsoil management | Excavator PC 200              | 920                          |
|                    | Dump truck capacity 20 ton    | 2760                         |
| Surface re-grading | Bulldozer D65P LGP or similar | 1380–1610                    |
| Topsoil spreading  | Excavator PC 200              | 920                          |
|                    | Dump truck capacity 20 ton    | 2760                         |
|                    | Bulldozer D65P LGP or similar | 990–1155                     |

Table S5. Sensitivity analysis on an annual increasing rate of 10% for 20 years.

|                             |      | Average Total Benefit (USD/ha) |        |        |        |        |        |        |        |        |        |        |        |        |        |        |         |         |         |         |         |         |
|-----------------------------|------|--------------------------------|--------|--------|--------|--------|--------|--------|--------|--------|--------|--------|--------|--------|--------|--------|---------|---------|---------|---------|---------|---------|
| Average Total Cost (USD/ha) | Year | 1                              | 2      | 3      | 4      | 5      | 6      | 7      | 8      | 9      | 10     | 11     | 12     | 13     | 14     | 15     | 16      | 17      | 18      | 19      | 20      |         |
|                             |      | 18,774                         | 27,803 | 30,583 | 33,642 | 37,006 | 40,706 | 44,777 | 49,255 | 54,180 | 59,598 | 65,558 | 72,114 | 79,325 | 87,258 | 95,983 | 105,582 | 116,140 | 127,754 | 140,529 | 154,582 | 170,041 |
|                             | 1    | 9,029                          | 18,774 | 21,554 | 24,612 | 27,977 | 31,677 | 35,748 | 40,225 | 45,151 | 50,569 | 56,529 | 63,085 | 70,296 | 78,228 | 86,954 | 96,553  | 107,111 | 118,725 | 131,500 | 145,553 | 161,011 |
|                             | 2    | 9,932                          | 17,871 | 20,651 | 23,709 | 27,074 | 30,774 | 34,845 | 39,323 | 44,248 | 49,666 | 55,626 | 62,182 | 69,393 | 77,326 | 86,051 | 95,650  | 106,208 | 117,822 | 130,597 | 144,650 | 160,108 |
|                             | 3    | 10,925                         | 16,878 | 19,658 | 22,716 | 26,080 | 29,781 | 33,852 | 38,329 | 43,255 | 48,673 | 54,633 | 61,188 | 68,400 | 76,332 | 85,058 | 94,656  | 105,215 | 116,829 | 129,604 | 143,657 | 159,115 |
|                             | 4    | 12,018                         | 15,785 | 18,565 | 21,624 | 24,988 | 28,688 | 32,759 | 37,237 | 42,162 | 47,580 | 53,540 | 60,096 | 67,307 | 75,240 | 83,966 | 93,564  | 104,122 | 115,736 | 128,512 | 142,564 | 158,023 |
|                             | 5    | 13,220                         | 14,583 | 17,364 | 20,422 | 23,786 | 27,487 | 31,557 | 36,035 | 40,960 | 46,378 | 52,338 | 58,894 | 66,105 | 74,038 | 82,764 | 92,362  | 102,920 | 114,534 | 127,310 | 141,363 | 156,821 |
|                             | 6    | 14,542                         | 13,261 | 16,042 | 19,100 | 22,464 | 26,165 | 30,235 | 34,713 | 39,638 | 45,057 | 51,016 | 57,572 | 64,784 | 72,716 | 81,442 | 91,040  | 101,598 | 113,212 | 125,988 | 140,041 | 155,499 |
|                             | 7    | 15,996                         | 11,807 | 14,587 | 17,646 | 21,010 | 24,711 | 28,781 | 33,259 | 38,184 | 43,602 | 49,562 | 56,118 | 63,329 | 71,262 | 79,988 | 89,586  | 100,144 | 111,758 | 124,534 | 138,587 | 154,045 |
|                             | 8    | 17,595                         | 10,208 | 12,988 | 16,046 | 19,410 | 23,111 | 27,182 | 31,659 | 36,585 | 42,003 | 47,963 | 54,518 | 61,730 | 69,662 | 78,388 | 87,986  | 98,545  | 110,159 | 122,934 | 136,987 | 152,445 |
|                             | 9    | 19,355                         | 8,448  | 11,228 | 14,287 | 17,651 | 21,351 | 25,422 | 29,900 | 34,825 | 40,243 | 46,203 | 52,759 | 59,970 | 67,903 | 76,628 | 86,227  | 96,785  | 108,399 | 121,174 | 135,227 | 150,686 |
|                             | 10   | 21,290                         | 6,513  | 9,293  | 12,351 | 15,715 | 19,416 | 23,487 | 27,964 | 32,890 | 38,308 | 44,268 | 50,823 | 58,035 | 65,967 | 74,693 | 84,291  | 94,850  | 106,464 | 119,239 | 133,292 | 148,750 |

|    |        |          |          |          |          |          |          |         |         |        |        |        |        |        |        |        |        |         |         |         |         |
|----|--------|----------|----------|----------|----------|----------|----------|---------|---------|--------|--------|--------|--------|--------|--------|--------|--------|---------|---------|---------|---------|
| 11 | 23,420 | 4,383    | 7,164    | 10,222   | 13,586   | 17,287   | 21,357   | 25,835  | 30,761  | 36,179 | 42,138 | 48,694 | 55,906 | 63,838 | 72,564 | 82,162 | 92,720 | 104,334 | 117,110 | 131,163 | 146,621 |
| 12 | 25,762 | 2,041    | 4,822    | 7,880    | 11,244   | 14,945   | 19,016   | 23,493  | 28,419  | 33,837 | 39,797 | 46,352 | 53,564 | 61,496 | 70,222 | 79,820 | 90,379 | 101,993 | 114,768 | 128,821 | 144,279 |
| 13 | 28,338 | (535)    | 2,246    | 5,304    | 8,668    | 12,369   | 16,439   | 20,917  | 25,843  | 31,261 | 37,220 | 43,776 | 50,988 | 58,920 | 67,646 | 77,244 | 87,802 | 99,416  | 112,192 | 126,245 | 141,703 |
| 14 | 31,171 | (3,368)  | (588)    | 2,470    | 5,834    | 9,535    | 13,606   | 18,083  | 23,009  | 28,427 | 34,387 | 40,942 | 48,154 | 56,086 | 64,812 | 74,410 | 84,969 | 96,583  | 109,358 | 123,411 | 138,869 |
| 15 | 34,289 | (6,486)  | (3,705)  | (647)    | 2,717    | 6,418    | 10,488   | 14,966  | 19,892  | 25,310 | 31,269 | 37,825 | 45,037 | 52,969 | 61,695 | 71,293 | 81,851 | 93,465  | 106,241 | 120,294 | 135,752 |
| 16 | 37,717 | (9,914)  | (7,134)  | (4,076)  | (712)    | 2,989    | 7,060    | 11,537  | 16,463  | 21,881 | 27,841 | 34,396 | 41,608 | 49,540 | 58,266 | 67,864 | 78,423 | 90,037  | 102,812 | 116,865 | 132,323 |
| 17 | 41,489 | (13,686) | (10,906) | (7,848)  | (4,483)  | (783)    | 3,288    | 7,766   | 12,691  | 18,109 | 24,069 | 30,625 | 37,836 | 45,769 | 54,494 | 64,093 | 74,651 | 86,265  | 99,040  | 113,093 | 128,551 |
| 18 | 45,638 | (17,835) | (15,055) | (11,996) | (8,632)  | (4,932)  | (861)    | 3,617   | 8,542   | 13,960 | 19,920 | 26,476 | 33,687 | 41,620 | 50,345 | 59,944 | 70,502 | 82,116  | 94,891  | 108,944 | 124,403 |
| 19 | 50,202 | (22,399) | (19,619) | (16,560) | (13,196) | (9,496)  | (5,425)  | (947)   | 3,978   | 9,396  | 15,356 | 21,912 | 29,123 | 37,056 | 45,782 | 55,380 | 65,938 | 77,552  | 90,328  | 104,380 | 119,839 |
| 20 | 55,222 | (27,419) | (24,639) | (21,580) | (18,216) | (14,516) | (10,445) | (5,967) | (1,042) | 4,376  | 10,336 | 16,892 | 24,103 | 32,036 | 40,761 | 50,360 | 60,918 | 72,532  | 85,307  | 99,360  | 114,819 |

Table S6. Sensitivity analysis on an annual increasing rate of 20% for 20 years.

|                             |      | Average Total Benefit (USD/ha) |           |           |           |           |           |           |           |           |           |           |           |          |          |         |         |         |         |         |         |         |
|-----------------------------|------|--------------------------------|-----------|-----------|-----------|-----------|-----------|-----------|-----------|-----------|-----------|-----------|-----------|----------|----------|---------|---------|---------|---------|---------|---------|---------|
| Average Total Cost (USD/ha) | Year | 1                              | 2         | 3         | 4         | 5         | 6         | 7         | 8         | 9         | 10        | 11        | 12        | 13       | 14       | 15      | 16      | 17      | 18      | 19      | 20      |         |
|                             |      | 18,774                         | 27,803    | 33,364    | 40,036    | 48,044    | 57,652    | 69,183    | 83,019    | 99,623    | 119,548   | 143,457   | 172,149   | 206,579  | 247,894  | 297,473 | 356,968 | 428,361 | 514,034 | 616,840 | 740,209 | 888,250 |
|                             | 1    | 9,029                          | 18,774    | 24,334    | 31,007    | 39,014    | 48,623    | 60,154    | 73,990    | 90,594    | 110,519   | 134,428   | 163,120   | 197,549  | 238,865  | 288,444 | 347,939 | 419,332 | 505,004 | 607,811 | 731,179 | 879,221 |
|                             | 2    | 10,835                         | 16,968    | 22,529    | 29,201    | 37,208    | 46,817    | 58,348    | 72,184    | 88,788    | 108,713   | 132,622   | 161,314   | 195,744  | 237,059  | 286,638 | 346,133 | 417,526 | 503,199 | 606,005 | 729,373 | 877,415 |
|                             | 3    | 13,002                         | 14,801    | 20,361    | 27,034    | 35,041    | 44,650    | 56,181    | 70,017    | 86,621    | 106,546   | 130,455   | 159,147   | 193,576  | 234,892  | 284,471 | 343,966 | 415,359 | 501,032 | 603,838 | 727,206 | 875,248 |
|                             | 4    | 15,603                         | 12,200    | 17,761    | 24,434    | 32,441    | 42,050    | 53,580    | 67,417    | 84,021    | 103,945   | 127,855   | 156,546   | 190,976  | 232,292  | 281,871 | 341,365 | 412,759 | 498,431 | 601,238 | 724,606 | 872,648 |
|                             | 5    | 18,723                         | 9,080     | 14,641    | 21,313    | 29,321    | 38,929    | 50,460    | 64,296    | 80,900    | 100,825   | 124,734   | 153,426   | 187,856  | 229,171  | 278,750 | 338,245 | 409,638 | 495,311 | 598,117 | 721,485 | 869,527 |
|                             | 6    | 22,468                         | 5,335     | 10,896    | 17,569    | 25,576    | 35,185    | 46,715    | 60,552    | 77,156    | 97,080    | 120,990   | 149,681   | 184,111  | 225,427  | 275,006 | 334,500 | 405,894 | 491,566 | 594,373 | 717,741 | 865,783 |
|                             | 7    | 26,961                         | 842       | 6,402     | 13,075    | 21,082    | 30,691    | 42,222    | 56,058    | 72,662    | 92,587    | 116,496   | 145,188   | 179,617  | 220,933  | 270,512 | 330,007 | 401,400 | 487,073 | 589,879 | 713,247 | 861,289 |
|                             | 8    | 32,353                         | (4,550)   | 1,010     | 7,683     | 15,690    | 25,299    | 36,829    | 50,666    | 67,270    | 87,194    | 111,104   | 139,795   | 174,225  | 215,541  | 265,120 | 324,614 | 396,008 | 481,680 | 584,487 | 707,855 | 855,897 |
|                             | 9    | 38,824                         | (11,021)  | (5,461)   | 1,212     | 9,219     | 18,828    | 30,359    | 44,195    | 60,799    | 80,724    | 104,633   | 133,325   | 167,754  | 209,070  | 258,649 | 318,144 | 389,537 | 475,210 | 578,016 | 701,384 | 849,426 |
|                             | 10   | 46,589                         | (18,786)  | (13,225)  | (6,553)   | 1,455     | 11,063    | 22,594    | 36,430    | 53,034    | 72,959    | 96,868    | 125,560   | 159,990  | 201,305  | 250,884 | 310,379 | 381,772 | 467,445 | 570,251 | 693,620 | 841,661 |
|                             | 11   | 55,907                         | (28,104)  | (22,543)  | (15,870)  | (7,863)   | 1,746     | 13,276    | 27,113    | 43,716    | 63,641    | 87,551    | 116,242   | 150,672  | 191,988  | 241,566 | 301,061 | 372,455 | 458,127 | 560,934 | 684,302 | 832,344 |
|                             | 12   | 67,088                         | (39,285)  | (33,724)  | (27,052)  | (19,044)  | (9,436)   | 2,095     | 15,931    | 32,535    | 52,460    | 76,369    | 105,061   | 139,491  | 180,806  | 230,385 | 289,880 | 361,273 | 446,946 | 549,752 | 673,120 | 821,162 |
|                             | 13   | 80,506                         | (52,703)  | (47,142)  | (40,469)  | (32,462)  | (22,853)  | (11,323)  | 2,514     | 19,117    | 39,042    | 62,952    | 91,643    | 126,073  | 167,389  | 216,968 | 276,462 | 347,856 | 433,528 | 536,335 | 659,703 | 807,745 |
|                             | 14   | 96,607                         | (68,804)  | (63,243)  | (56,571)  | (48,563)  | (38,955)  | (27,424)  | (13,588)  | 3,016     | 22,941    | 46,851    | 75,542    | 109,972  | 151,288  | 200,866 | 260,361 | 331,755 | 417,427 | 520,234 | 643,602 | 791,643 |
|                             | 15   | 115,928                        | (88,125)  | (82,565)  | (75,892)  | (67,885)  | (58,276)  | (46,745)  | (32,909)  | (16,305)  | 3,620     | 27,529    | 56,221    | 90,650   | 131,966  | 181,545 | 241,040 | 312,433 | 398,105 | 500,912 | 624,280 | 772,322 |
|                             | 16   | 139,114                        | (111,311) | (105,750) | (99,078)  | (91,070)  | (81,462)  | (69,931)  | (56,095)  | (39,491)  | (19,566)  | 4,344     | 33,035    | 67,465   | 108,780  | 158,359 | 217,854 | 289,248 | 374,920 | 477,727 | 601,095 | 749,136 |
|                             | 17   | 166,937                        | (139,134) | (133,573) | (126,900) | (118,893) | (109,284) | (97,754)  | (83,917)  | (67,313)  | (47,389)  | (23,479)  | 5,212     | 39,642   | 80,958   | 130,537 | 190,031 | 261,425 | 347,097 | 449,904 | 573,272 | 721,314 |
|                             | 18   | 200,324                        | (172,521) | (166,960) | (160,288) | (152,280) | (142,672) | (131,141) | (117,305) | (100,701) | (80,776)  | (56,867)  | (28,175)  | 6,255    | 47,570   | 97,149  | 156,644 | 228,037 | 313,710 | 416,517 | 539,885 | 687,926 |
|                             | 19   | 240,389                        | (212,586) | (207,025) | (200,352) | (192,345) | (182,736) | (171,206) | (157,369) | (140,766) | (120,841) | (96,931)  | (68,240)  | (33,810) | 7,506    | 57,084  | 116,579 | 187,973 | 273,645 | 376,452 | 499,820 | 647,862 |
|                             | 20   | 288,466                        | (260,663) | (255,103) | (248,430) | (240,423) | (230,814) | (219,284) | (205,447) | (188,843) | (168,919) | (145,009) | (116,318) | (81,888) | (40,572) | 9,007   | 68,501  | 139,895 | 225,567 | 328,374 | 451,742 | 599,784 |

Table S7. Sensitivity analysis on an annual decreasing rate of 10% for 20 years.

|                             | Year | Average Total Benefit (USD/ha) |        |        |        |        |        |        |        |        |        |        |       |       |         |         |         |         |         |         |         |         |
|-----------------------------|------|--------------------------------|--------|--------|--------|--------|--------|--------|--------|--------|--------|--------|-------|-------|---------|---------|---------|---------|---------|---------|---------|---------|
|                             |      | 1                              | 2      | 3      | 4      | 5      | 6      | 7      | 8      | 9      | 10     | 11     | 12    | 13    | 14      | 15      | 16      | 17      | 18      | 19      | 20      |         |
| Average Total Cost (USD/ha) |      | 18,774                         | 27,803 | 25,023 | 22,520 | 20,268 | 18,242 | 16,417 | 14,776 | 13,298 | 11,968 | 10,771 | 9,694 | 8,725 | 7,852   | 7,067   | 6,360   | 5,724   | 5,152   | 4,637   | 4,173   | 3,756   |
|                             | 1    | 9,029                          | 18,774 | 15,993 | 13,491 | 11,239 | 9,212  | 7,388  | 5,746  | 4,269  | 2,939  | 1,742  | 665   | (304) | (1,177) | (1,962) | (2,669) | (3,305) | (3,877) | (4,392) | (4,856) | (5,273) |
|                             | 2    | 8,126                          | 19,677 | 16,896 | 14,394 | 12,142 | 10,115 | 8,291  | 6,649  | 5,172  | 3,842  | 2,645  | 1,568 | 599   | (274)   | (1,059) | (1,766) | (2,402) | (2,974) | (3,490) | (3,953) | (4,371) |
|                             | 3    | 7,314                          | 20,489 | 17,709 | 15,207 | 12,955 | 10,928 | 9,104  | 7,462  | 5,984  | 4,655  | 3,458  | 2,381 | 1,411 | 539     | (247)   | (953)   | (1,589) | (2,162) | (2,677) | (3,141) | (3,558) |
|                             | 4    | 6,582                          | 21,221 | 18,440 | 15,938 | 13,686 | 11,659 | 9,835  | 8,193  | 6,716  | 5,386  | 4,189  | 3,112 | 2,143 | 1,270   | 485     | (222)   | (858)   | (1,430) | (1,946) | (2,409) | (2,827) |
|                             | 5    | 5,924                          | 21,879 | 19,099 | 16,596 | 14,344 | 12,317 | 10,493 | 8,852  | 7,374  | 6,044  | 4,847  | 3,770 | 2,801 | 1,928   | 1,143   | 436     | (200)   | (772)   | (1,287) | (1,751) | (2,168) |
|                             | 6    | 5,332                          | 22,471 | 19,691 | 17,189 | 14,937 | 12,910 | 11,086 | 9,444  | 7,966  | 6,637  | 5,440  | 4,363 | 3,393 | 2,521   | 1,735   | 1,029   | 393     | (180)   | (695)   | (1,159) | (1,576) |
|                             | 7    | 4,799                          | 23,004 | 20,224 | 17,722 | 15,470 | 13,443 | 11,619 | 9,977  | 8,500  | 7,170  | 5,973  | 4,896 | 3,926 | 3,054   | 2,269   | 1,562   | 926     | 353     | (162)   | (625)   | (1,043) |
|                             | 8    | 4,319                          | 23,484 | 20,704 | 18,202 | 15,950 | 13,923 | 12,099 | 10,457 | 8,979  | 7,650  | 6,453  | 5,376 | 4,406 | 3,534   | 2,748   | 2,042   | 1,406   | 833     | 318     | (146)   | (563)   |
|                             | 9    | 3,887                          | 23,916 | 21,136 | 18,634 | 16,382 | 14,355 | 12,531 | 10,889 | 9,411  | 8,081  | 6,885  | 5,808 | 4,838 | 3,966   | 3,180   | 2,474   | 1,838   | 1,265   | 750     | 286     | (131)   |
|                             | 10   | 3,498                          | 24,305 | 21,525 | 19,022 | 16,770 | 14,743 | 12,919 | 11,278 | 9,800  | 8,470  | 7,273  | 6,196 | 5,227 | 4,354   | 3,569   | 2,862   | 2,226   | 1,654   | 1,139   | 675     | 258     |
|                             | 11   | 3,148                          | 24,655 | 21,874 | 19,372 | 17,120 | 15,093 | 13,269 | 11,627 | 10,150 | 8,820  | 7,623  | 6,546 | 5,577 | 4,704   | 3,919   | 3,212   | 2,576   | 2,004   | 1,488   | 1,025   | 607     |
|                             | 12   | 2,833                          | 24,970 | 22,189 | 19,687 | 17,435 | 15,408 | 13,584 | 11,942 | 10,465 | 9,135  | 7,938  | 6,861 | 5,891 | 5,019   | 4,234   | 3,527   | 2,891   | 2,318   | 1,803   | 1,340   | 922     |
|                             | 13   | 2,550                          | 25,253 | 22,473 | 19,970 | 17,718 | 15,691 | 13,867 | 12,226 | 10,748 | 9,418  | 8,221  | 7,144 | 6,175 | 5,302   | 4,517   | 3,810   | 3,174   | 2,602   | 2,087   | 1,623   | 1,206   |
|                             | 14   | 2,295                          | 25,508 | 22,728 | 20,225 | 17,973 | 15,946 | 14,122 | 12,481 | 11,003 | 9,673  | 8,476  | 7,399 | 6,430 | 5,557   | 4,772   | 4,065   | 3,429   | 2,857   | 2,342   | 1,878   | 1,461   |
|                             | 15   | 2,066                          | 25,737 | 22,957 | 20,455 | 18,203 | 16,176 | 14,352 | 12,710 | 11,232 | 9,903  | 8,706  | 7,629 | 6,659 | 5,787   | 5,002   | 4,295   | 3,659   | 3,086   | 2,571   | 2,107   | 1,690   |
|                             | 16   | 1,859                          | 25,944 | 23,164 | 20,661 | 18,409 | 16,383 | 14,558 | 12,917 | 11,439 | 10,109 | 8,912  | 7,835 | 6,866 | 5,993   | 5,208   | 4,501   | 3,865   | 3,293   | 2,778   | 2,314   | 1,897   |
|                             | 17   | 1,673                          | 26,130 | 23,350 | 20,847 | 18,595 | 16,568 | 14,744 | 13,103 | 11,625 | 10,295 | 9,098  | 8,021 | 7,052 | 6,179   | 5,394   | 4,687   | 4,051   | 3,479   | 2,964   | 2,500   | 2,083   |
|                             | 18   | 1,506                          | 26,297 | 23,517 | 21,015 | 18,763 | 16,736 | 14,912 | 13,270 | 11,792 | 10,462 | 9,266  | 8,188 | 7,219 | 6,347   | 5,561   | 4,855   | 4,219   | 3,646   | 3,131   | 2,667   | 2,250   |
|                             | 19   | 1,355                          | 26,448 | 23,667 | 21,165 | 18,913 | 16,886 | 15,062 | 13,420 | 11,943 | 10,613 | 9,416  | 8,339 | 7,370 | 6,497   | 5,712   | 5,005   | 4,369   | 3,797   | 3,282   | 2,818   | 2,401   |
|                             | 20   | 1,220                          | 26,583 | 23,803 | 21,301 | 19,049 | 17,022 | 15,198 | 13,556 | 12,078 | 10,749 | 9,552  | 8,475 | 7,505 | 6,633   | 5,847   | 5,141   | 4,505   | 3,932   | 3,417   | 2,953   | 2,536   |

Table S8. Sensitivity analysis on an annual decreasing rate of 20% for 20 years.

|                             | Year | Average Total Benefit (USD/ha) |        |        |        |        |        |       |         |         |         |         |         |         |         |         |         |         |         |         |         |         |
|-----------------------------|------|--------------------------------|--------|--------|--------|--------|--------|-------|---------|---------|---------|---------|---------|---------|---------|---------|---------|---------|---------|---------|---------|---------|
|                             |      | 1                              | 2      | 3      | 4      | 5      | 6      | 7     | 8       | 9       | 10      | 11      | 12      | 13      | 14      | 15      | 16      | 17      | 18      | 19      | 20      |         |
| Average Total Cost (USD/ha) |      | 18,774                         | 27,803 | 22,242 | 17,794 | 14,235 | 11,388 | 9,110 | 7,288   | 5,831   | 4,665   | 3,732   | 2,985   | 2,388   | 1,911   | 1,528   | 1,223   | 978     | 783     | 626     | 501     | 401     |
|                             | 1    | 9,029                          | 18,774 | 13,213 | 8,765  | 5,206  | 2,359  | 81    | (1,741) | (3,199) | (4,365) | (5,298) | (6,044) | (6,641) | (7,119) | (7,501) | (7,806) | (8,051) | (8,247) | (8,403) | (8,528) | (8,629) |
|                             | 2    | 7,223                          | 20,580 | 15,019 | 10,571 | 7,012  | 4,165  | 1,887 | 65      | (1,393) | (2,559) | (3,492) | (4,238) | (4,835) | (5,313) | (5,695) | (6,001) | (6,245) | (6,441) | (6,597) | (6,723) | (6,823) |
|                             | 3    | 5,779                          | 22,024 | 16,464 | 12,015 | 8,456  | 5,609  | 3,332 | 1,510   | 52      | (1,114) | (2,047) | (2,793) | (3,390) | (3,868) | (4,250) | (4,556) | (4,800) | (4,996) | (5,153) | (5,278) | (5,378) |
|                             | 4    | 4,623                          | 23,180 | 17,619 | 13,171 | 9,612  | 6,765  | 4,488 | 2,665   | 1,208   | 42      | (891)   | (1,638) | (2,235) | (2,712) | (3,094) | (3,400) | (3,645) | (3,840) | (3,997) | (4,122) | (4,222) |
|                             | 5    | 3,698                          | 24,105 | 18,544 | 14,096 | 10,537 | 7,690  | 5,412 | 3,590   | 2,132   | 966     | 33      | (713)   | (1,310) | (1,788) | (2,170) | (2,476) | (2,720) | (2,916) | (3,072) | (3,198) | (3,298) |
|                             | 6    | 2,959                          | 24,844 | 19,284 | 14,835 | 11,276 | 8,429  | 6,152 | 4,330   | 2,872   | 1,706   | 773     | 27      | (570)   | (1,048) | (1,430) | (1,736) | (1,980) | (2,176) | (2,333) | (2,458) | (2,558) |
|                             | 7    | 2,367                          | 25,436 | 19,875 | 15,427 | 11,868 | 9,021  | 6,744 | 4,921   | 3,464   | 2,298   | 1,365   | 618     | 21      | (456)   | (838)   | (1,144) | (1,389) | (1,584) | (1,741) | (1,866) | (1,966) |
|                             | 8    | 1,894                          | 25,909 | 20,349 | 15,900 | 12,342 | 9,495  | 7,217 | 5,395   | 3,937   | 2,771   | 1,838   | 1,092   | 495     | 17      | (365)   | (671)   | (915)   | (1,111) | (1,268) | (1,393) | (1,493) |
|                             | 9    | 1,515                          | 26,288 | 20,728 | 16,279 | 12,720 | 9,873  | 7,596 | 5,774   | 4,316   | 3,150   | 2,217   | 1,470   | 873     | 396     | 14      | (292)   | (537)   | (732)   | (889)   | (1,014) | (1,114) |
|                             | 10   | 1,212                          | 26,591 | 21,031 | 16,582 | 13,023 | 10,176 | 7,899 | 6,077   | 4,619   | 3,453   | 2,520   | 1,773   | 1,176   | 699     | 317     | 11      | (234)   | (429)   | (586)   | (711)   | (811)   |
|                             | 11   | 970                            | 26,833 | 21,273 | 16,824 | 13,266 | 10,419 | 8,141 | 6,319   | 4,861   | 3,695   | 2,762   | 2,016   | 1,419   | 941     | 559     | 253     | 9       | (187)   | (343)   | (469)   | (569)   |
|                             | 12   | 776                            | 27,027 | 21,467 | 17,018 | 13,460 | 10,613 | 8,335 | 6,513   | 5,055   | 3,889   | 2,956   | 2,210   | 1,613   | 1,135   | 753     | 447     | 203     | 7       | (150)   | (275)   | (375)   |
|                             | 13   | 620                            | 27,183 | 21,622 | 17,173 | 13,615 | 10,768 | 8,490 | 6,668   | 5,210   | 4,044   | 3,111   | 2,365   | 1,768   | 1,290   | 908     | 602     | 358     | 162     | 6       | (120)   | (220)   |
|                             | 14   | 496                            | 27,307 | 21,746 | 17,298 | 13,739 | 10,892 | 8,614 | 6,792   | 5,334   | 4,168   | 3,235   | 2,489   | 1,892   | 1,414   | 1,032   | 726     | 482     | 286     | 130     | 4       | (96)    |
|                             | 15   | 397                            | 27,406 | 21,845 | 17,397 | 13,838 | 10,991 | 8,713 | 6,891   | 5,434   | 4,267   | 3,335   | 2,588   | 1,991   | 1,513   | 1,131   | 826     | 581     | 385     | 229     | 104     | 4       |
|                             | 16   | 318                            | 27,485 | 21,925 | 17,476 | 13,917 | 11,070 | 8,793 | 6,971   | 5,513   | 4,347   | 3,414   | 2,668   | 2,071   | 1,593   | 1,211   | 905     | 661     | 465     | 308     | 183     | 83      |
|                             | 17   | 254                            | 27,549 | 21,988 | 17,540 | 13,981 | 11,134 | 8,856 | 7,034   | 5,577   | 4,410   | 3,478   | 2,731   | 2,134   | 1,656   | 1,274   | 969     | 724     | 528     | 372     | 247     | 147     |
|                             | 18   | 203                            | 27,600 | 22,039 | 17,591 | 14,032 | 11,185 | 8,907 | 7,085   | 5,627   | 4,461   | 3,528   | 2,782   | 2,185   | 1,707   | 1,325   | 1,019   | 775     | 579     | 423     | 298     | 197     |
|                             | 19   | 163                            | 27,640 | 22,080 | 17,631 | 14,072 | 11,225 | 8,948 | 7,126   | 5,668   | 4,502   | 3,569   | 2,823   | 2,226   | 1,748   | 1,366   | 1,060   | 816     | 620     | 463     | 338     | 238     |
|                             | 20   | 130                            | 27,673 | 22,112 | 17,664 | 14,105 | 11,258 | 8,980 | 7,158   | 5,701   | 4,534   | 3,602   | 2,855   | 2,258   | 1,780   | 1,398   | 1,093   | 848     | 652     | 496     | 371     | 271     |
