# Supplementary material
Source: MDPI journal article supplement (https://www.mdpi.com/2079-9276/10/6/60)
Supplement: s1 [file s1]

AREAL : DISPOSAL  
ITEM WOR : TOPSOIL SPREADING  
UNIT : Ha

| No. | Description                                  | Code | Coefficient | Unit                 | Remark |
|-----|----------------------------------------------|------|-------------|----------------------|--------|
| I.  | ASSUMPTION                                   |      |             |                      |        |
| 1   | Effective work hour (daily)                  | Tk   | 8.00        | hour                 |        |
|     | Topsoil Thickness                            | t    | 0.30        | m                    |        |
|     | Solid Factor                                 |      | 1.10        |                      |        |
|     | Volume per Ha                                | V    | 5,610.00    | ton/ha               |        |
| II  | WORK METHOD                                  |      |             |                      |        |
| 1   | Setting the areal                            |      |             |                      |        |
| 2   | Topsoil material loading using Excavator     |      |             |                      |        |
| 3   | Material hauling using Dump truck            |      |             |                      |        |
| 4   | Topsoil spreading using Buldozer             |      |             |                      |        |
| III | EQUIPMENT and WORK FORCE                     |      |             |                      |        |
| 1   | Heavy Equipment                              |      |             |                      |        |
|     | BULDOZER BD. 65P LGP.                        |      |             |                      |        |
|     | Length of blade                              | Lb   | 3.97        | m                    |        |
|     | Forward speed                                | Vf   | 3,900.00    | m/hour               |        |
|     | Reverse speed                                | Vr   | 5,000.00    | m/hour               |        |
|     | Average spread range                         | J    | 20.00       | m                    |        |
|     | Heavy equipment Work Efficiency              | Ea   | 0.70        |                      |        |
|     | Blade Angle Factor                           | Fs   | 1.00        |                      |        |
|     | Fixed time assumption                        | t    | 0.00        | hour                 |        |
|     | Height of blade                              | Tb   | 1.10        | m                    |        |
|     | Height of spreading                          | Th   | 0.36        |                      |        |
|     | Production Capacity (hourly)                 |      |             |                      |        |
|     | $Lb \times Tb \times Th \times Ea \times Fs$ |      |             |                      |        |
|     | Q =                                          | Q    | 101.95      | m <sup>3</sup> /hour |        |
|     | $J/Vf + J/Vr + t$                            |      | 173.31      | ton/hour             |        |
|     | Heavy Equipment coefficient per Ha = $V/Q1$  | Ca   | 32.37       | hour                 |        |

AREAL : DISPOSAL  
ITEM WOR : TOPSOIL HAULING  
UNIT : Ha

| No. | Description                                                | Code | Coefficient | Unit     | Remark |
|-----|------------------------------------------------------------|------|-------------|----------|--------|
| I.  | ASSUMPTION                                                 |      |             |          |        |
| 1   | Effective work hour (daily)                                | Tk   | 8.00        | hour     |        |
|     | Topsoil Thickness                                          | t    | 0.30        | m        |        |
|     | Solid Factor                                               |      | 1.25        |          |        |
|     | Volume per Ha                                              | V    | 6,375.00    | ton/ha   |        |
|     | Hauling distance                                           | j    | 0.25        | km       |        |
| II  | WORK METHOD                                                |      |             |          |        |
| 1   | Setting the areal                                          |      |             |          |        |
| 2   | Topsoil material loading using Excavator                   |      |             |          |        |
| 3   | Material hauling using Dump truck class 20 ton (10 wheels) |      |             |          |        |
| III | EQUIPMENT and WORK FORCE                                   |      |             |          |        |
| 1   | Heavy Equipment                                            |      |             |          |        |
|     | EXCAVATOR PC. 200                                          |      |             |          |        |
|     | Bucket Capacity                                            | Kb   | 0.80        | m3       |        |
|     | Bucket Factor                                              | Fb   | 1.00        |          |        |
|     | Heavy equipment Work Efficiency                            | Ea   | 0.85        |          |        |
|     | Time Cycle                                                 |      |             |          |        |
|     | - Excavation and Loading Time                              | t1   | 0.01        | hour     |        |
|     | - Extra                                                    | t5   | 0.00        | hour     |        |
|     | Total time cycle                                           | T    | 0.01        | hour     |        |
|     | Production Capacity                                        |      |             |          |        |
|     | $Kb \times Fb \times Ea$                                   |      |             |          |        |
|     | Q =                                                        | Q    | 81.60       | m3/hour  |        |
|     | $T \times Fh$                                              |      | 138.72      | ton/hour |        |
|     | Heavy Equipment coefficient per Ha = $V/Q$                 | Ca   | 45.96       | hour     |        |
| 2   | DUMP TRUCK (for material hauling)                          |      |             |          |        |
|     | Dump capacity                                              | Kb   | 12.00       | m3       |        |
|     | Dump efficiency                                            | Eb   | 0.80        |          |        |
|     | Heavy equipment Work Efficiency                            | Ea   | 0.80        |          |        |
|     | Average speed at full loaded                               | Vb   | 30.00       | Km/hour  |        |
|     | Average speed at empty                                     | Vk   | 35.00       | Km/hour  |        |
|     | Average distance                                           | J    | 5.00        | Km       |        |
|     | Material expanding factor                                  | Fp   | 1.00        |          |        |
|     | Time cycle                                                 |      |             |          |        |
|     | Loaded time                                                | t1   | 0.17        | hour     |        |
|     | Empty time                                                 | t2   | 0.14        | hour     |        |
|     | Loading time                                               | t3   | 0.12        | hour     |        |
|     | Extra                                                      | t4   | 0.04        | hour     |        |
|     | Total time cycle                                           | T    | 0.47        | hour     |        |
|     | $Kb \times Ea \times Eb$                                   |      |             |          |        |
|     | Q =                                                        | Q2   | 16.32       | m3/hour  |        |
|     | $T \times Fp$                                              |      | 27.75       | ton/hour |        |
|     | Heavy equipment coefficient per Ha = $V/Q2$                | Ca   | 229.74      | hour     |        |

AREAL : DISPOSAL (OB density 1.7)  
 ITEM WOR : Re Sloping/surface grading in regular area  
 UNIT : Ha

| No. | Description                                                                                      | Code | Coefficient | Unit      | Remark |
|-----|--------------------------------------------------------------------------------------------------|------|-------------|-----------|--------|
| I.  | ASSUMPTION                                                                                       |      |             |           |        |
| 1   | Effective work hour (daily)                                                                      | Tk   | 8.00        | hour      |        |
| 2   | Material volume that must be reslope/regrade                                                     | V    | 8,500.00    | ton/ha    |        |
|     |                                                                                                  |      | 5,000.00    | m3/ha     |        |
| II  | WORK METHOD                                                                                      |      |             |           |        |
| 1   | Setting the areal                                                                                |      |             |           |        |
| 2   | Excavation is carried out by pushing the material from top to bottom as well as material filling |      |             |           |        |
| 3   | After resloping, the surface is leveled mukaan atas                                              |      |             |           |        |
| III | EQUIPMENT and WORK FORCE                                                                         |      |             |           |        |
| 1   | Heavy Equipment                                                                                  |      |             |           |        |
|     | BULDOZER BD. 65P LGP. CUT & FILL                                                                 |      |             |           |        |
|     | Length of blade                                                                                  | Lb   | 3.97        | m         |        |
|     | Forward speed                                                                                    | Vf   | 5,500.00    | m/hour    |        |
|     | Reverse speed                                                                                    | Vr   | 4,500.00    | m/hour    |        |
|     | Average pushing distance                                                                         | J    | 50.00       | m         |        |
|     | Heavy equipment Work Efficiency                                                                  | Ea   | 0.85        |           |        |
|     | Blade Angle Factor                                                                               | Fs   | 0.80        |           |        |
|     | Fixed time assumption                                                                            | t    | 0.03        | hour      |        |
|     | Average thickness of cut-fill material                                                           | H    | 0.50        | m         |        |
|     | Height of blade                                                                                  | Tb   | 1.10        | m         |        |
|     | Production Capacity for Cut and Fill                                                             |      |             |           |        |
|     | $Lb \times Tb \times Tb \times Ea \times Fs$                                                     |      |             |           |        |
|     | Q =                                                                                              | Q1   | 122.03      | m3/hour   |        |
|     | $J/Vf + J/Vr + t$                                                                                |      | 207.45      | ton /hour |        |
|     | Heavy equipment coefficient per Ha = $V / Q1$                                                    | Ca   | 40.97       | hour      |        |
| 1   | BULDOZER BD. 65P LGP. (SURFACE GRADING)                                                          |      |             |           |        |
|     | Length of blade                                                                                  | Lb   | 3.97        | m         |        |
|     | Forward speed                                                                                    | Vf   | 3,900.00    | m/hour    |        |
|     | Reverse speed                                                                                    | Vr   | 5,000.00    | m/hour    |        |
|     | Average pushing distance                                                                         | J    | 50.00       | m         |        |
|     | Heavy equipment Work Efficiency                                                                  | Ea   | 0.85        |           |        |
|     | Blade Angle Factor                                                                               | Fs   | 0.80        |           |        |
|     | Fixed time assumption                                                                            | t    | 0.00        | hour      |        |
|     | Height of blade                                                                                  | Tb   | 1.10        | m         |        |
|     | Production Capacity (hourly)                                                                     |      |             |           |        |
|     | $Lb \times J \times Ea \times Fs$                                                                |      |             |           |        |
|     | Q =                                                                                              | Q2   | 5,706.47    | m2/hour   |        |
|     | $J/Vf + J/Vr + t$                                                                                |      | 1,940.20    | ton/hour  |        |
|     | Heavy Equipment coefficient per Ha = $V/Q2$                                                      | Ca   | 4.38        | hour      |        |

## FUEL CONSUMPTION

| No. | Equipment               | Fuel<br>(Ltr/hour) | Prod. Cap<br>(hour/ha) | Prod. Cap<br>(hour/ha) | Prod. Cap<br>(hour/ha) |
|-----|-------------------------|--------------------|------------------------|------------------------|------------------------|
| 1   | BULDOZER D 65 P LGP     | 30                 | 33.00                  | 0                      | 46                     |
| 2   | BULDOZER D 85 SS        | 35                 | 33.00                  | 0                      | 46                     |
| 3   | EXCAVATOR PC 300        | 25                 | -                      | 0                      | 0                      |
| 4   | EXCAVATOR PC 200        | 20                 | -                      | 46                     | 0                      |
| 5   | DUMP TRUCK class 20 ton | 12                 | -                      | 230                    | 0                      |
